# Supplementary material for: Novel pyrenylbenzylidene-malononitrile derivative mixed with cellulose acetate electrospun nanofibrous sheets for hydrazine detection
Source: Royal Society of Chemistry journal article supplement (doi:10.1039/d4nj02383h), 2024-01-01
Supplement: d4nj02383h1.pdf [file d4nj02383h1.pdf]

## Supporting Information

### **Novel Pyrenylbenzylidene-Malononitrile Derivative Mixed with Cellulose Acetate Electrospun Nanofibrous Sheets for Hydrazine Detection**

Pipattra Mayurachayakul,<sup>a</sup> Jirawan Thianchai,<sup>a</sup> Naraporn Attakul,<sup>a</sup> Kornkanya Pratumyot,<sup>a</sup> Mongkol Sukwattanasinitt,<sup>b</sup> Kittiwat Srikittiwanna<sup>a</sup> and Nakorn Niamnont<sup>\*a</sup>

<sup>a</sup>*Supramolecular Chemistry Research Unit, Department of Chemistry, Faculty of Science, King Mongkut's University of Technology Thonburi (KMUTT), Pracha Uthit Road, Bang Mod, Thung Khru, Bangkok 10140, Thailand*

<sup>b</sup>*Organic Synthesis Research Unit, Department of Chemistry, Faculty of Science and Nanotec-CU Center of Excellence on Food and Agriculture, Chulalongkorn University, Bangkok, 10330, Thailand*

E-mail: nakorn.nia@kmutt.ac.th

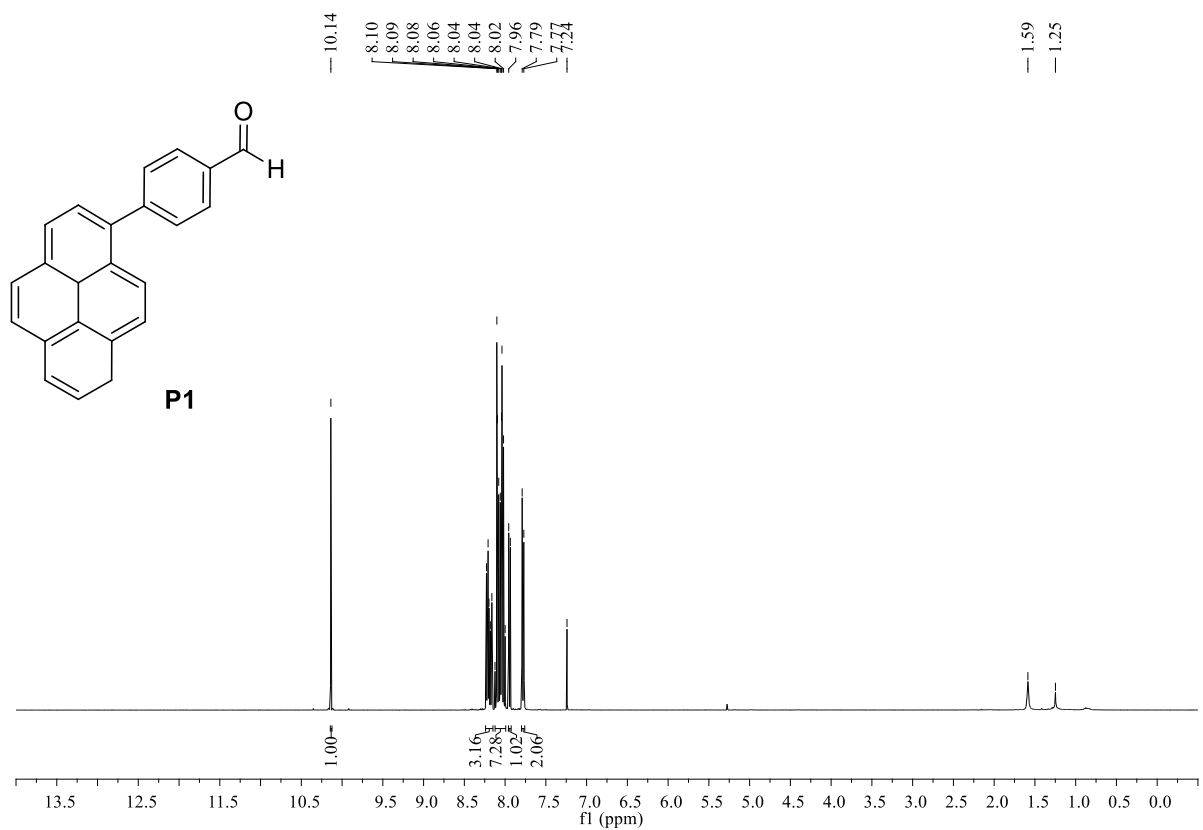

**Figure S1:** The  $^1\text{H NMR}$  (400 MHz,  $\text{CDCl}_3$ ) spectrum of compound **P1**.

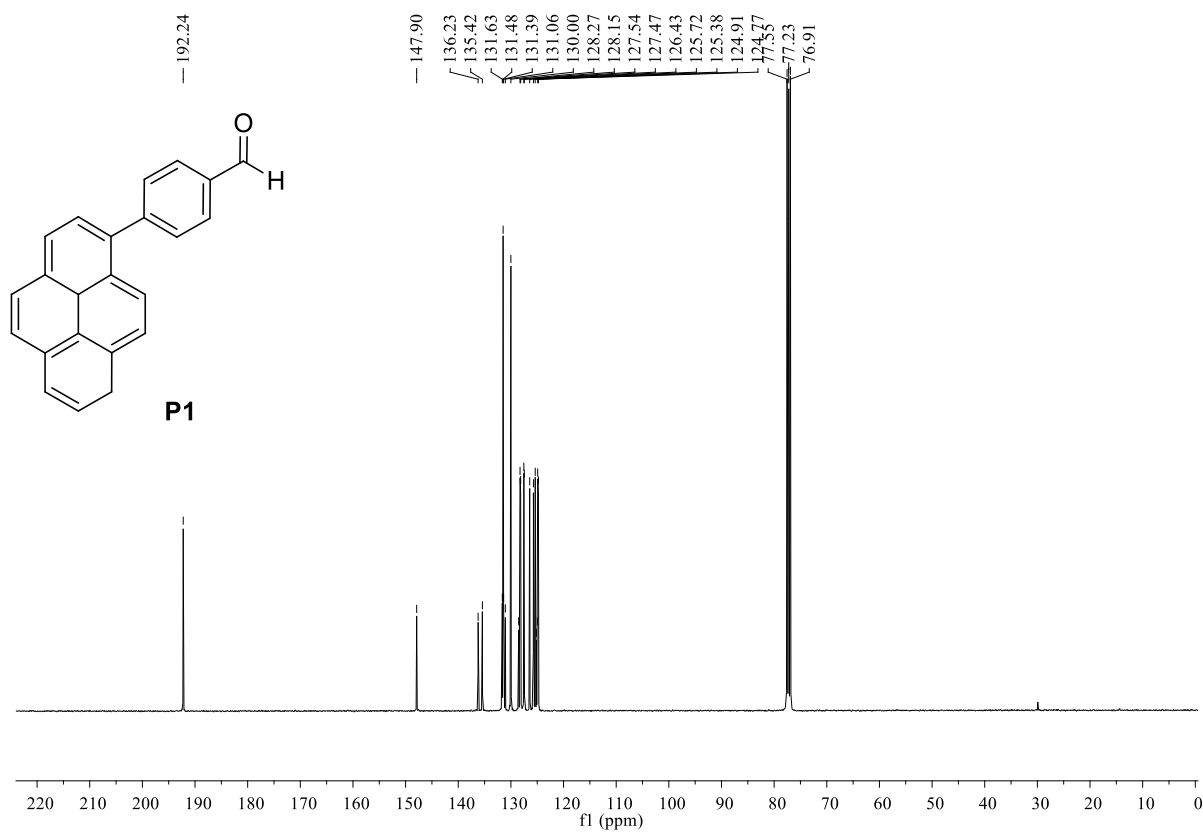

**Figure S2:** The  $^{13}\text{C NMR}$  (100 MHz,  $\text{CDCl}_3$ ) spectrum of compound **P1**.

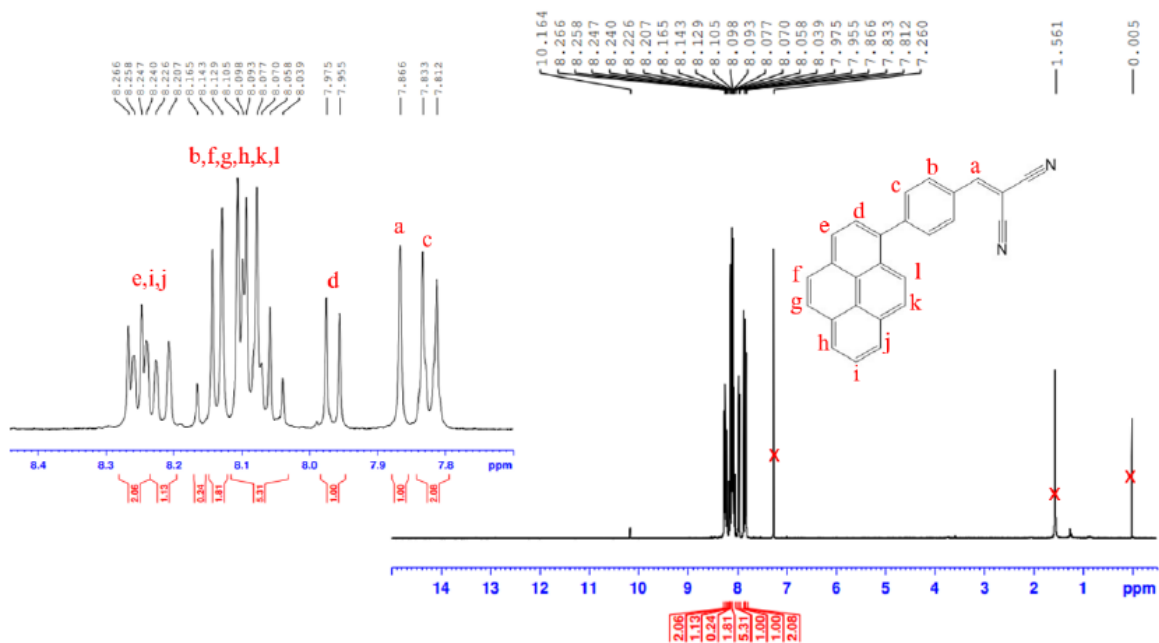

**Figure S3:** The <sup>1</sup>H NMR (400 MHz, CDCl<sub>3</sub>) spectra of compound P2.

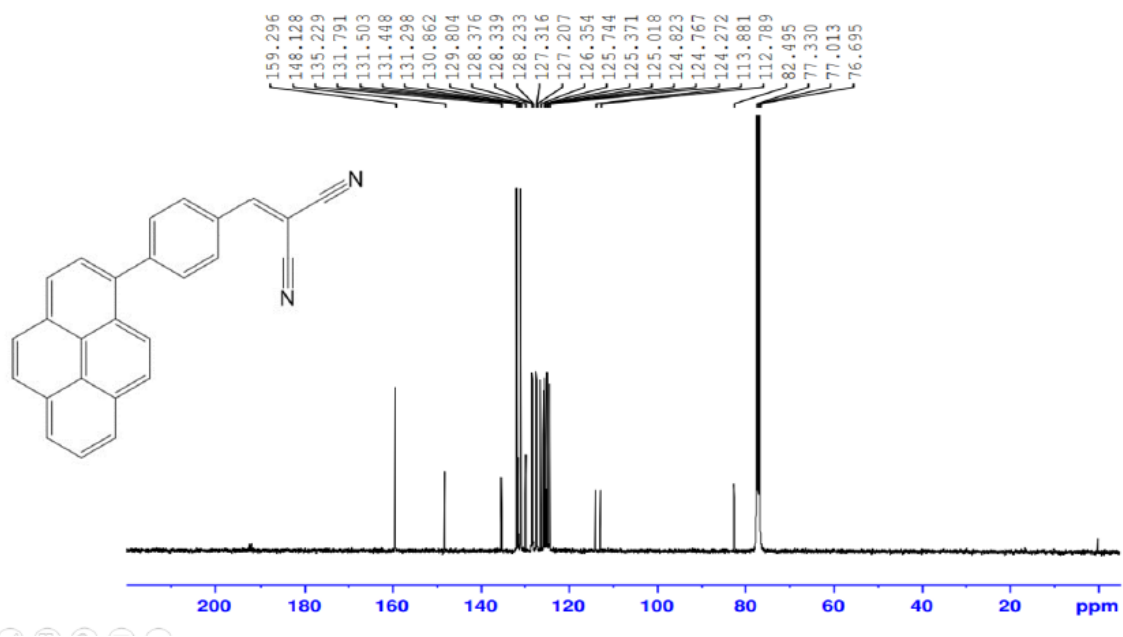

**Figure S4:** The <sup>13</sup>C NMR (100 MHz, CDCl<sub>3</sub>) spectrum of compound P2.

| Acquisition Parameter |            |                      |          |                  |           |
|-----------------------|------------|----------------------|----------|------------------|-----------|
| Source Type           | ESI        | Ion Polarity         | Positive | Set Nebulizer    | 2.0 Bar   |
| Focus                 | Not active |                      |          | Set Dry Heater   | 200 °C    |
| Scan Begin            | 50 m/z     | Set Capillary        | 4500 V   | Set Dry Gas      | 8.0 l/min |
| Scan End              | 2000 m/z   | Set End Plate Offset | -500 V   | Set Divert Valve | Waste     |

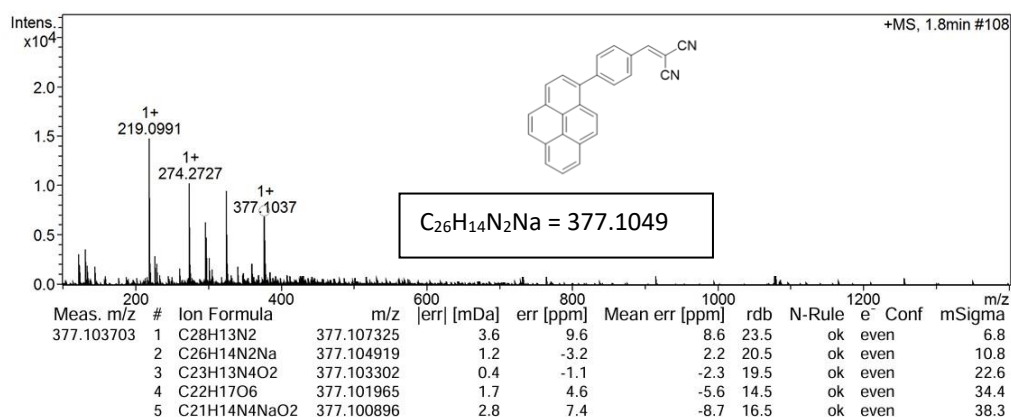

**Figure S5:** HRMS spectrum of compound **P2**.

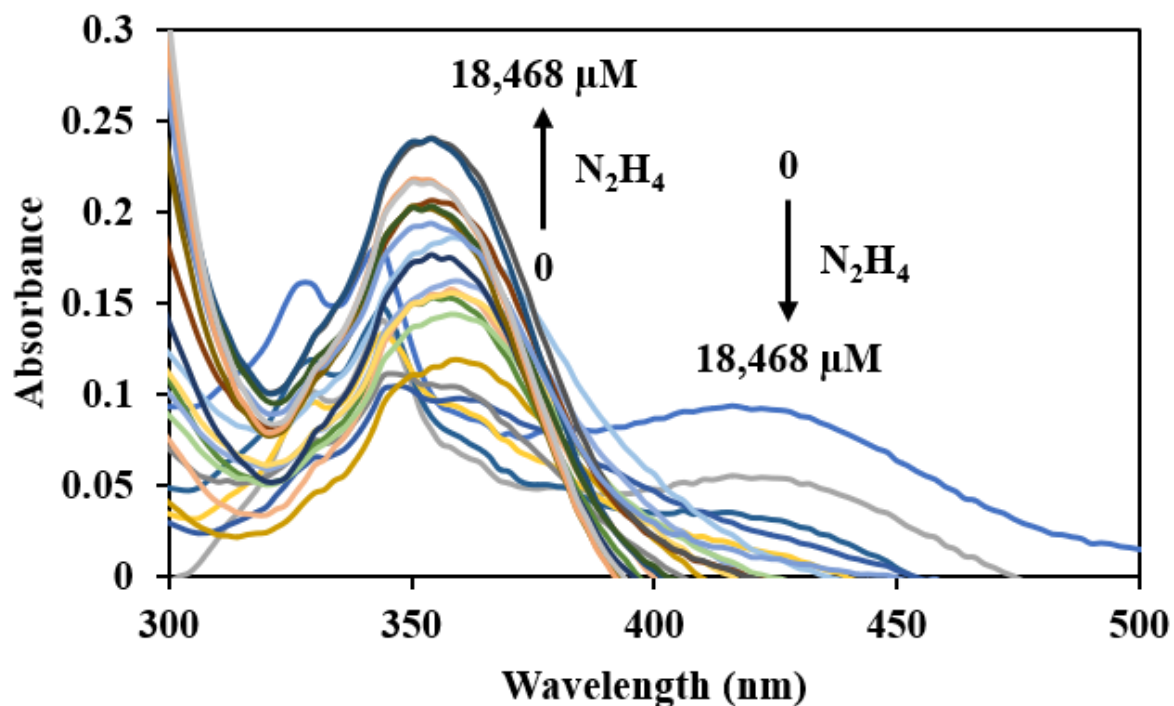

**Figure S6:** Absorption spectra of compound **P2** (10  $\mu\text{M}$ ) upon the addition of hydrazine (0-18,468  $\mu\text{M}$ ) in 10% THF-PBS pH 7.4.

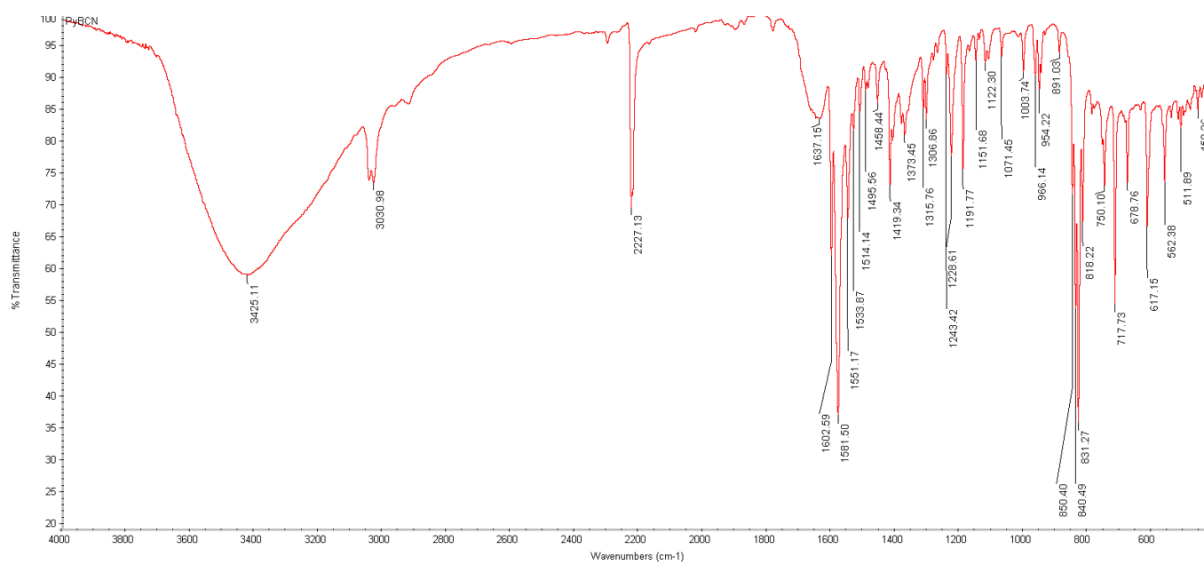

**Figure S7:** FT-IR spectrum of compound **P2**.

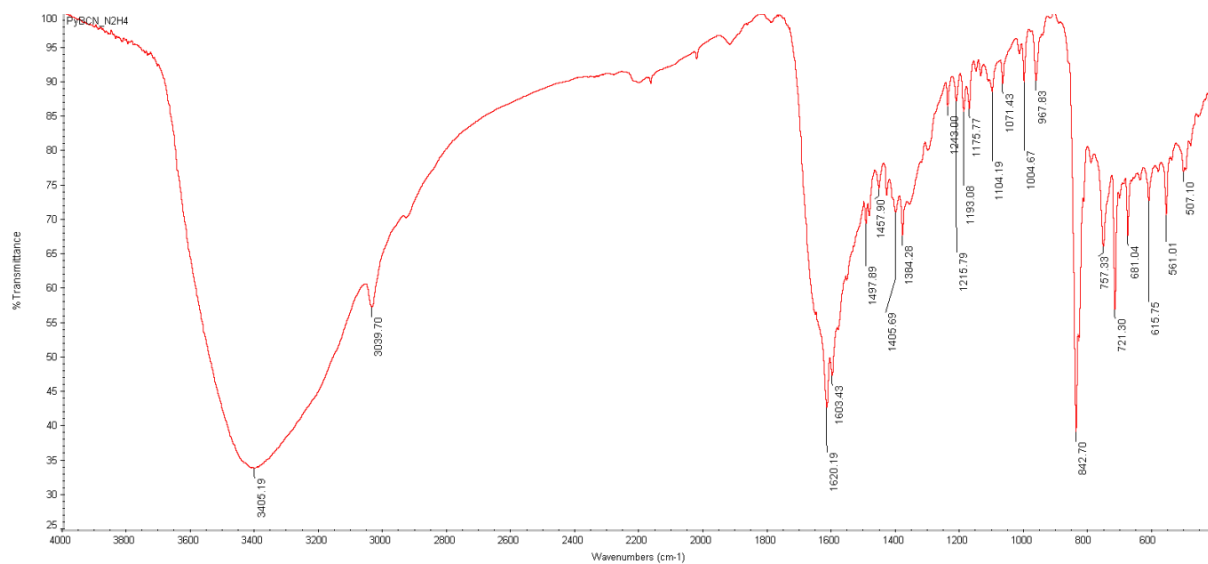

**Figure S8:** FT-IR spectrum of compound **P2-NH<sub>2</sub>NH<sub>2</sub>**.
